# Supplementary material for: Sustainable composites from poly(3-hydroxybutyrate) (PHB) bioplastic and agave natural fibre
Source: Royal Society of Chemistry journal article supplement (doi:10.1039/d0gc00365d), 2020-01-01
Supplement: d0gc00365d1.pdf [file d0gc00365d1.pdf]

## **Sustainable composites from poly(3-hydroxybutyrate) (PHB) bioplastic and agave natural fibre**

Megan K. M. Smith<sup>1,2</sup>, Drupitha MP<sup>1</sup>, Mohamed Abdelwahab<sup>1,3</sup>, Deborah F. Mielewski<sup>4</sup>, Manjusri Misra<sup>\*1,2</sup>, and Amar Kumar Mohanty<sup>\*1,2</sup>

<sup>1</sup>Bioproducts Discovery and Development Centre, Department of Plant Agriculture, Crop Science Building, University of Guelph, Guelph, N1G 2W1, Ontario, Canada

<sup>2</sup>School of Engineering, Thornbrough Building, University of Guelph, Guelph, N1G 2W1, Ontario, Canada

<sup>3</sup>Department of Chemistry, Faculty of Science, Tanta University, Tanta 31527, Egypt

<sup>4</sup>Research and Innovation Center, Ford Motor Company, Dearborn, Michigan 48124, United States

\*Correspondence to: M. Misra (email [mmisra@uoguelph.ca](mailto:mmisra@uoguelph.ca)) and A. K. Mohanty (email [mohanty@uoguelph.ca](mailto:mohanty@uoguelph.ca))

### **Supporting Information**

1. Experimental
  - 1.1 Agave fibre

The extraction of agave fibre is a tedious process<sup>1</sup> and usually it is generated as a byproduct of Tequila production. Tequila is prepared by the distillation of fermented juice of agave plant, Agave tequilana. The agave fibre which we have used is obtained from Mexico, which is the main worldwide producer in this traditional industry and 75 % of agave species are from Mexico.<sup>2</sup> The properties of agave fibre will vary according to the sources. Prior to the processing, we have not adopted any treatment method or washing<sup>3</sup> to avoid the water consumption and hence to achieve more economic green composite based on agave natural fibre and PHB bioplastic.

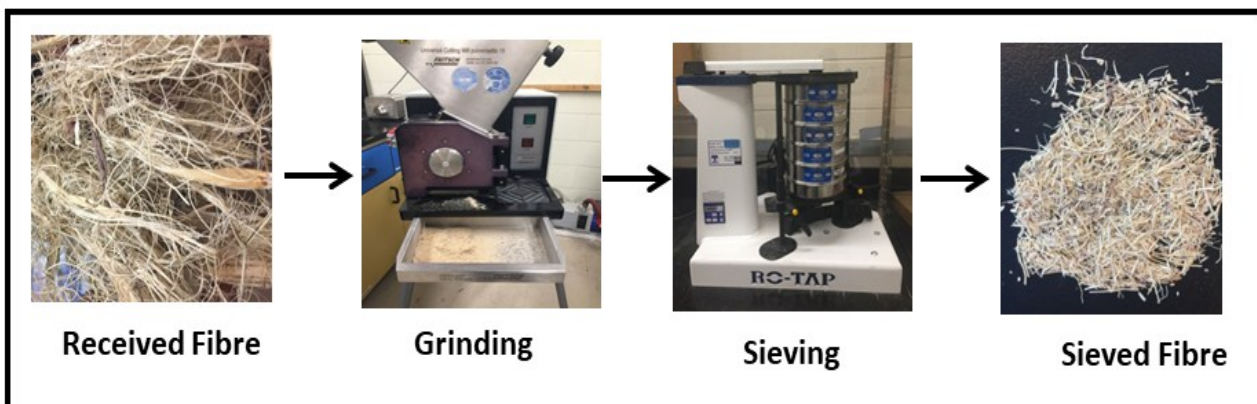

Figure S1: Digital images of agave fibre before and after grinding and sieving processes

## 2. Grafting Parameters

The grafting percentage (% GP) and grafting efficiency of (% GE) of PHB on agave was calculated using the following equations.<sup>4</sup>

$$\% \text{ GP} = (W_{\text{gPHB}} - W_{\text{AF1}}) / W_{\text{AF1}} \times 100 \text{--- (1)}$$

$$\% \text{ GE} = (W_{\text{gPHB}} - W_{\text{AF1}}) / W_{\text{PHB1}} \times 100 \text{--- (1)}$$

Where  $W_{\text{gPHB}}$ ,  $W_{\text{AF1}}$  and  $W_{\text{PHB1}}$  are the weights of the grafted PHB recovered after Soxhlet extraction, initial weight of agave fibre and initial weight of PHB respectively.

Table S1: Grafting percentage and grafting efficiency of PHB agave composites

| Sample ID            | Grafting Percentage (%) | Grafting efficiency (%) |
|----------------------|-------------------------|-------------------------|
| <b>75/25/0</b>       | 0.16±0                  | 0.06                    |
| <b>75/25/0.1 phr</b> | 26±6                    | 7±2                     |

The increased grafting percentage and grafting efficiency of PHB\_agave composites after luperox addition confirms the grafting reaction between PHB and agave induced by the organic peroxide.

### 3. SEM analysis

The SEM images of impact fractured surfaces of 75/25/0.5phr are given in Figure S1.

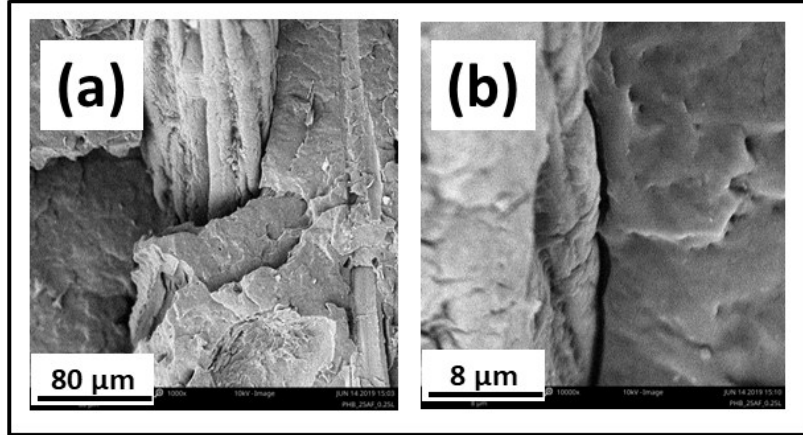

Figure S2: SEM images of 75/25/0.5phr (a) at 1000x magnification and (b)10000x magnification

### 4. Thermogravimetric analysis

Table S2: TGA of agave fibre, neat PHB and their composites with and without organic peroxide

| Sample      | Onset Degradation Temp. (°C) | Max. Degradation Temp. (°C) |              |              | Char Residue at 600 °C (%) |
|-------------|------------------------------|-----------------------------|--------------|--------------|----------------------------|
| Agave Fibre | 257.1 (1.73)                 | 301.7 (0.33)                | 364.3 (0.70) | 491.5 (2.23) | 18.94 (1.86)               |
| Neat PHB    | 272.2 (2.52)                 | 293.1 (1.10)                |              |              | 0.78 (0.54)                |
| 85/15/0     | 275.0 (0.19)                 | 289.5 (0.20)                |              |              | 3.88 (0.81)                |
| 75/25/0     | 275.3 (0.55)                 | 287.6 (0.66)                |              |              | 5.92 (1.50)                |
| 75/25/0.05  | 274.6 (0.95)                 | 286.3 (0.91)                |              |              | 4.57 (0.34)                |
| 75/25/0.1   | 270.1 (1.94)                 | 283.8(1.29)                 |              |              | 5.48 (0.98)                |
| 75/25/0.25  | 273.5 (0.39)                 | 284.9 (0.24)                |              |              | 6.21 (0.81)                |
| 75/25/0.5   | 272.6 (0.2)                  | 284.5 (0.21)                |              |              | 5.36 (0.98)                |

## Reference

- 1 A. Hulle, P. Kadole and P. Katkar, *Fibers*, 2015, **3**, 64–75.
- 2 J. C. López-Romero, J. F. Ayala-Zavala, G. A. González-Aguilar, E. A. Peña-Ramos and H. González-Ríos, *J. Sci. Food Agric.*, 2018, **98**, 2461–2474.
- 3 G. Sanchez-Olivares, S. Rabe, R. Pérez-Chávez, F. Calderas and B. Schartel, *Compos. Part B Eng.*, 2019, **177**, 1–15.
- 4 L. Wei, A. G. McDonald and N. M. Stark, *Biomacromolecules*, 2015, **16**, 1040–1049.
